# Supplementary material for: Effects of template molecules on the structures and luminescence intensities of a series of porous Tb-MOFs based on the 2-nitroterephthalate ligand
Source: Royal Society of Chemistry journal article supplement (doi:10.1039/c8ra01224e), 2018-01-01
Supplement: c8ra01224e1.pdf [file c8ra01224e1.pdf]

***Electronic Supplementary Information for***

**Effects of template molecules on the structures and luminescence  
intensities of a series of porous Tb-MOFs based on 2-  
nitroterephthalate ligand**

Yixia Ren\*, Xiaolong Zhao, Zhixiang Wang, Yong Pan, Huiping Li,  
Feiyan Wang, Shaofeng Zhu, Chenhui Shao

*College of Chemistry and Chemical Engineering, Laboratory of New Energy and New Function Materials, Yan'an  
University, Yan'an 716000, P. R. China.*

*E-mail: renyixia1@163.com*

***RSC advances***

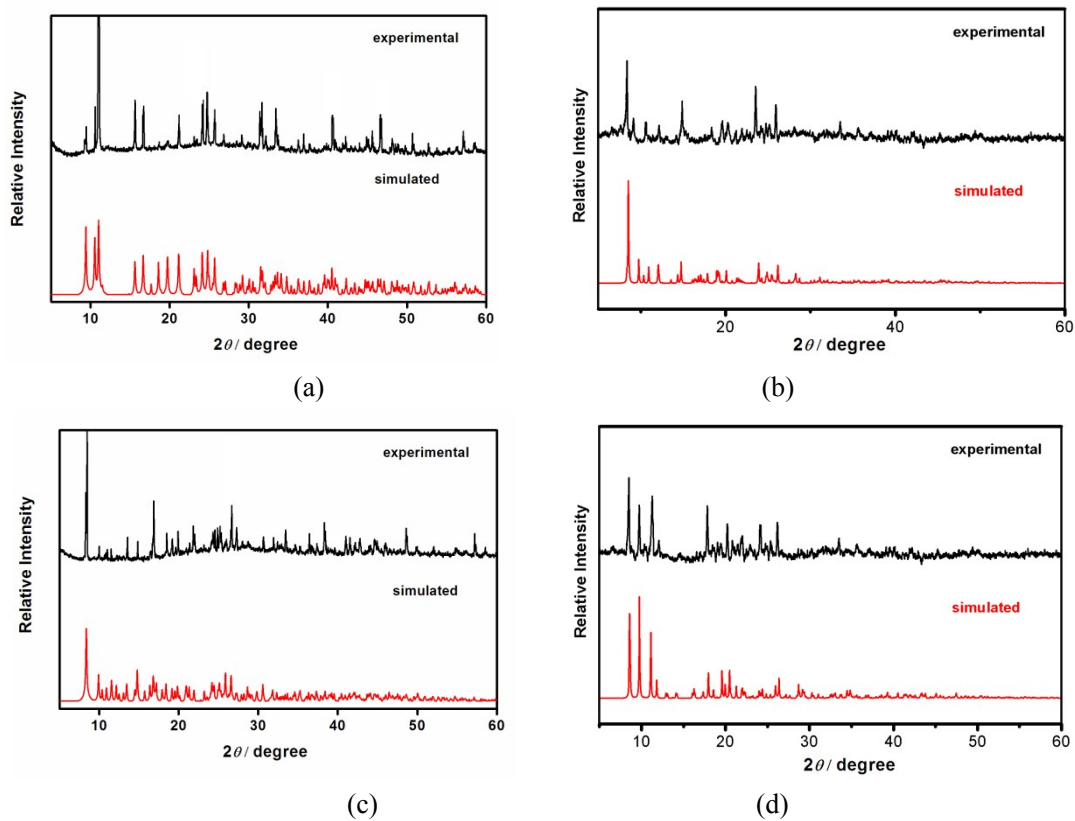

**Fig. S1** The PXR D patterns for complexes 1(a),2(b),3(c) and 4(d).

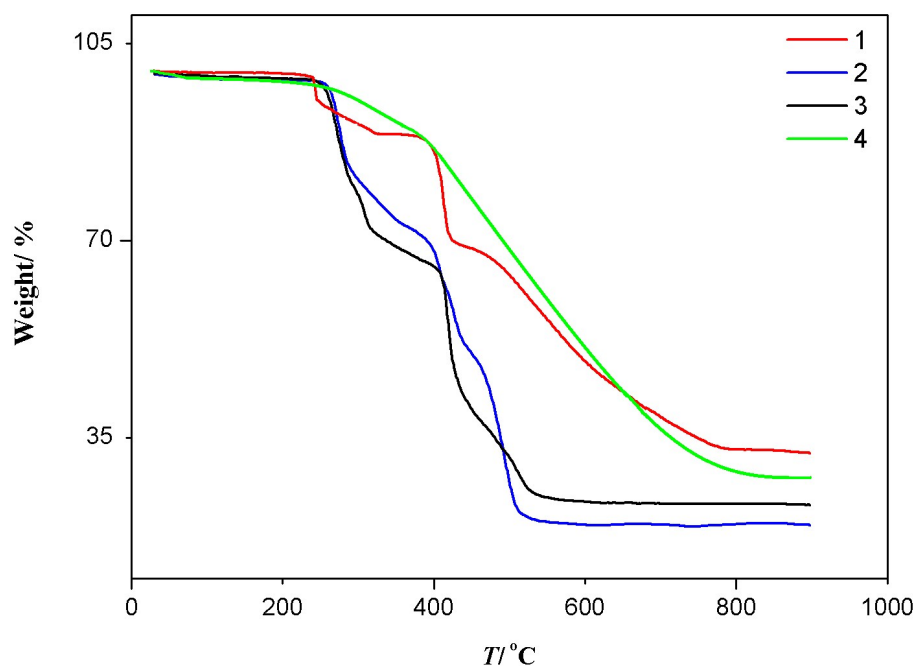

**Fig. S2** The thermo-gravimetric curves for complexes 1-4

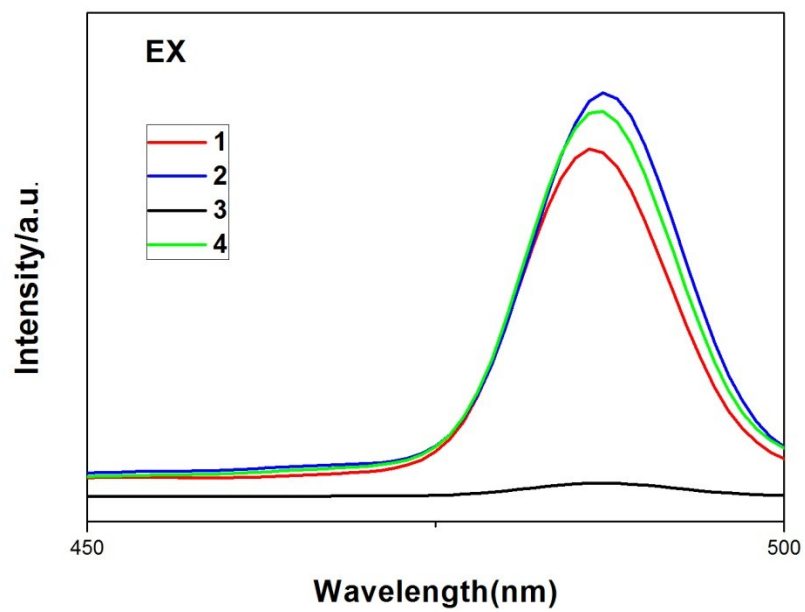

Fig.S3 The excitation spectra of complexes 1-4.

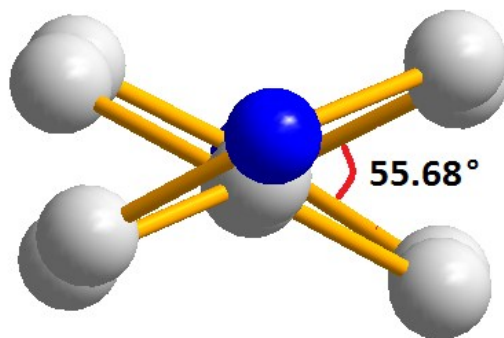

(a)

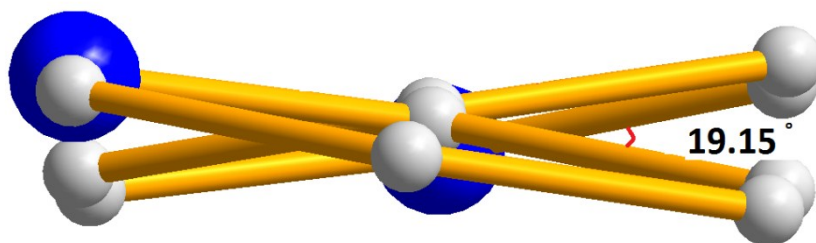

(b)

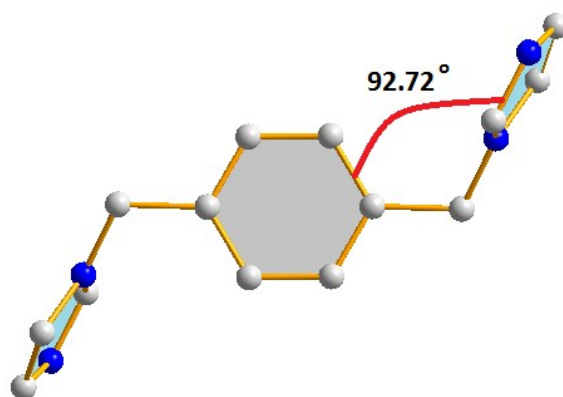

(c)

**Fig.S4** The dihedral angles of guests: 4,4'-bipy(a), 2,4-bipy(b) and 1,4-bbi(c) in complexes 2-4.

**Table S1** Selected bond lengths (Å) and angles (°) for complex 1

|                      |            |                     |            |
|----------------------|------------|---------------------|------------|
| Tb(1)-O(1)#1         | 2.292(2)   | Tb(1)-O(11)         | 2.373(3)   |
| Tb(1)-O(2)#2         | 2.317(2)   | Tb(1)-O(10)#4       | 2.388(2)   |
| Tb(1)-O(7)           | 2.324(2)   | Tb(1)-O(4)          | 2.473(3)   |
| Tb(1)-O(3)#3         | 2.336(3)   | Tb(1)-O(3)          | 2.601(3)   |
| O(1)#1-Tb(1)-O(2)#2  | 86.99(9)   | O(11)-Tb(1)-O(10)#4 | 70.30(10)  |
| O(1)#1-Tb(1)-O(7)    | 99.78(9)   | O(1)#1-Tb(1)-O(4)   | 157.37(11) |
| O(2)#2-Tb(1)-O(7)    | 74.15(9)   | O(2)#2-Tb(1)-O(4)   | 80.71(9)   |
| O(1)#1-Tb(1)-O(3)#3  | 77.35(10)  | O(7)-Tb(1)-O(4)     | 95.06(10)  |
| O(2)#2-Tb(1)-O(3)#3  | 142.51(9)  | O(3)#3-Tb(1)-O(4)   | 123.28(9)  |
| O(7)-Tb(1)-O(3)#3    | 75.27(9)   | O(11)-Tb(1)-O(4)    | 75.70(11)  |
| O(1)#1-Tb(1)-O(11)   | 82.93(11)  | O(10)#4-Tb(1)-O(4)  | 79.47(10)  |
| O(2)#2-Tb(1)-O(11)   | 75.89(11)  | O(1)#1-Tb(1)-O(3)   | 150.67(10) |
| O(7)-Tb(1)-O(11)     | 149.71(10) | O(2)#2-Tb(1)-O(3)   | 117.75(8)  |
| O(3)#3-Tb(1)-O(11)   | 133.98(10) | O(7)-Tb(1)-O(3)     | 74.53(8)   |
| O(1)#1-Tb(1)-O(10)#4 | 100.43(10) | O(3)#3-Tb(1)-O(3)   | 73.37(9)   |
| O(2)#2-Tb(1)-O(10)#4 | 144.04(10) | O(11)-Tb(1)-O(3)    | 116.71(9)  |
| O(7)-Tb(1)-O(10)#4   | 137.23(10) | O(10)#4-Tb(1)-O(3)  | 69.44(9)   |
| O(3)#3-Tb(1)-O(10)#4 | 73.00(9)   | O(4)-Tb(1)-O(3)     | 50.56(9)   |

Symmetry transformations used to generate equivalent atoms: #1: 0.5+x, 1.5-y, -0.5+z; #2: 0.5-x, 0.5+y, 0.5-z; #3: 1-x, y, 0.5-z; #4: x, -1+y, z.

**Table S2** Selected bond lengths (Å) and angles (°) for complex 2

|              |          |            |          |
|--------------|----------|------------|----------|
| Tb(1)-O(6)#1 | 2.304(2) | Tb(1)-O(1) | 2.443(2) |
| Tb(1)-O(1W)  | 2.390(2) | Tb(1)-O(7) | 2.471(2) |

|                      |            |                       |           |
|----------------------|------------|-----------------------|-----------|
| Tb(1)-O(8)           | 2.391(3)   | Tb(1)-O(12)#3         | 2.512(2)  |
| Tb(1)-O(2)#2         | 2.400(2)   | Tb(1)-O(2)            | 2.638(2)  |
| Tb(1)-O(11)#3        | 2.427(3)   |                       |           |
| O(6)#1-Tb(1)-O(1W)   | 83.28(9)   | O(11)#3-Tb(1)-O(7)    | 78.78(9)  |
| O(6)#1-Tb(1)-O(8)    | 75.36(10)  | O(1)-Tb(1)-O(7)       | 149.77(9) |
| O(1W)-Tb(1)-O(8)     | 73.26(8)   | O(6)#1-Tb(1)-O(12)#3  | 77.01(9)  |
| O(6)#1-Tb(1)-O(2)#2  | 155.74(9)  | O(1W)-Tb(1)-O(12)#3   | 153.74(9) |
| O(1W)-Tb(1)-O(2)#2   | 81.88(8)   | O(8)-Tb(1)-O(12)#3    | 117.23(8) |
| O(8)-Tb(1)-O(2)#2    | 82.03(9)   | O(2)#2-Tb(1)-O(12)#3  | 122.17(8) |
| O(6)#1-Tb(1)-O(11)#3 | 129.48(9)  | O(11)#3-Tb(1)-O(12)#3 | 52.67(8)  |
| O(1W)-Tb(1)-O(11)#3  | 141.53(8)  | O(1)-Tb(1)-O(12)#3    | 78.17(9)  |
| O(8)-Tb(1)-O(11)#3   | 128.38(9)  | O(7)-Tb(1)-O(12)#3    | 71.74(9)  |
| O(2)#2-Tb(1)-O(11)#3 | 72.22(8)   | O(6)#1-Tb(1)-O(2)     | 126.25(8) |
| O(6)#1-Tb(1)-O(1)    | 79.50(9)   | O(1W)-Tb(1)-O(2)      | 71.36(8)  |
| O(1W)-Tb(1)-O(1)     | 81.34(9)   | O(8)-Tb(1)-O(2)       | 134.79(8) |
| O(8)-Tb(1)-O(1)      | 145.92(10) | O(2)#2-Tb(1)-O(2)     | 66.00(9)  |
| O(2)#2-Tb(1)-O(1)    | 116.85(8)  | O(11)#3-Tb(1)-O(2)    | 72.29(8)  |
| O(11)#3-Tb(1)-O(1)   | 85.51(9)   | O(1)-Tb(1)-O(2)       | 50.92(7)  |
| O(6)#1-Tb(1)-O(7)    | 90.75(9)   | O(7)-Tb(1)-O(2)       | 142.38(8) |
| O(1W)-Tb(1)-O(7)     | 126.21(9)  | O(12)#3-Tb(1)-O(2)    | 106.90(8) |
| O(8)-Tb(1)-O(7)      | 53.68(8)   | O(2)#2-Tb(1)-O(7)     | 82.74(8)  |

Symmetry transformations used to generate equivalent atoms: #1: 1.5-x, 0.5+y, 0.5-z; #2: 2-x, 1-y, -z; #3: 1.5-x, -0.5+y, -0.5-z.

**Table S3** Selected bond lengths (Å) and angles (°) for complex **3**

|                      |            |                     |            |
|----------------------|------------|---------------------|------------|
| Tb(1)-O(12)#1        | 2.2778(16) | Tb(1)-O(7)          | 2.4461(18) |
| Tb(1)-O(8)#2         | 2.3715(17) | Tb(1)-O(5)#3        | 2.4598(18) |
| Tb(1)-O(1W)          | 2.3961(17) | Tb(1)-O(2)          | 2.5481(18) |
| Tb(1)-O(1)           | 2.4095(17) | Tb(1)-O(8)          | 2.6714(18) |
| Tb(1)-O(6)#3         | 2.4455(18) |                     |            |
| O(12)#1-Tb(1)-O(8)#2 | 155.05(6)  | O(1)-Tb(1)-O(5)#3   | 125.47(7)  |
| O(12)#1-Tb(1)-O(1W)  | 83.13(6)   | O(6)#3-Tb(1)-O(5)#3 | 53.02(6)   |
| O(8)#2-Tb(1)-O(1W)   | 78.43(6)   | O(7)-Tb(1)-O(5)#3   | 148.47(7)  |
| O(12)#1-Tb(1)-O(1)   | 130.41(6)  | O(12)#1-Tb(1)-O(2)  | 78.23(6)   |
| O(8)#2-Tb(1)-O(1)    | 73.24(6)   | O(8)#2-Tb(1)-O(2)   | 123.53(6)  |
| O(1W)-Tb(1)-O(1)     | 141.45(6)  | O(1W)-Tb(1)-O(2)    | 155.93(6)  |
| O(12)#1-Tb(1)-O(6)#3 | 94.68(7)   | O(1)-Tb(1)-O(2)     | 52.47(6)   |
| O(8)#2-Tb(1)-O(6)#3  | 83.17(6)   | O(6)#3-Tb(1)-O(2)   | 70.53(6)   |
| O(1W)-Tb(1)-O(6)#3   | 126.59(6)  | O(7)-Tb(1)-O(2)     | 78.13(7)   |
| O(1)-Tb(1)-O(6)#3    | 75.50(6)   | O(5)#3-Tb(1)-O(2)   | 114.26(6)  |
| O(12)#1-Tb(1)-O(7)   | 78.79(6)   | O(12)#1-Tb(1)-O(8)  | 123.74(6)  |
| O(8)#2-Tb(1)-O(7)    | 115.21(6)  | O(8)#2-Tb(1)-O(8)   | 65.12(6)   |
| O(1W)-Tb(1)-O(7)     | 83.44(7)   | O(1W)-Tb(1)-O(8)    | 70.64(6)   |
| O(1)-Tb(1)-O(7)      | 85.50(7)   | O(1)-Tb(1)-O(8)     | 73.94(6)   |

|                      |           |                   |           |
|----------------------|-----------|-------------------|-----------|
| O(6)#3-Tb(1)-O(7)    | 148.66(7) | O(6)#3-Tb(1)-O(8) | 140.92(6) |
| O(12)#1-Tb(1)-O(5)#3 | 75.96(7)  | O(7)-Tb(1)-O(8)   | 50.18(6)  |
| O(8)#2-Tb(1)-O(5)#3  | 83.11(6)  | O(5)#3-Tb(1)-O(8) | 136.85(6) |
| O(1W)-Tb(1)-O(5)#3   | 75.12(6)  | O(2)-Tb(1)-O(8)   | 107.66(6) |

Symmetry transformations used to generate equivalent atoms: #1:  $-1.5-x, -0.5+y, 1.5-z$ ; #2:  $-x, 1-y, 1-z$ ; #3:  $-0.5+x, -0.5+y, -1.5+z$ .

**Table S4** Selected bond lengths (Å) and angles (°) for complex 4

|                    |            |                     |            |
|--------------------|------------|---------------------|------------|
| Tb(1)-O(6)         | 2.338(5)   | Tb(1)-O(16)         | 2.428(6)   |
| Tb(1)-O(10)        | 2.339(5)   | Tb(1)-O(8)#1        | 2.471(6)   |
| Tb(1)-O(11)        | 2.355(5)   | Tb(1)-O(3)          | 2.505(5)   |
| Tb(1)-O(4)         | 2.371(5)   | Tb(1)-O(6)#1        | 2.724(6)   |
| Tb(1)-O(15)        | 2.406(5)   |                     |            |
| O(6)-Tb(1)-O(10)   | 75.73(16)  | O(15)-Tb(1)-O(8)#1  | 145.23(18) |
| O(6)-Tb(1)-O(11)   | 71.88(16)  | O(16)-Tb(1)-O(8)#1  | 78.0(2)    |
| O(10)-Tb(1)-O(11)  | 132.91(19) | O(6)-Tb(1)-O(3)     | 77.8(2)    |
| O(6)-Tb(1)-O(4)    | 143.03(17) | O(10)-Tb(1)-O(3)    | 78.04(18)  |
| O(10)-Tb(1)-O(4)   | 141.23(18) | O(11)-Tb(1)-O(3)    | 125.55(17) |
| O(11)-Tb(1)-O(4)   | 76.83(18)  | O(4)-Tb(1)-O(3)     | 106.02(19) |
| O(6)-Tb(1)-O(15)   | 82.10(19)  | O(15)-Tb(1)-O(3)    | 52.7(2)    |
| O(10)-Tb(1)-O(15)  | 129.26(18) | O(16)-Tb(1)-O(3)    | 72.9(2)    |
| O(11)-Tb(1)-O(15)  | 78.75(19)  | O(8)#1-Tb(1)-O(3)   | 149.15(18) |
| O(4)-Tb(1)-O(15)   | 72.82(18)  | O(6)-Tb(1)-O(6)#1   | 72.2(2)    |
| O(6)-Tb(1)-O(16)   | 140.58(18) | O(10)-Tb(1)-O(6)#1  | 67.61(15)  |
| O(10)-Tb(1)-O(16)  | 72.80(19)  | O(11)-Tb(1)-O(6)#1  | 70.48(15)  |
| O(11)-Tb(1)-O(16)  | 147.44(18) | O(4)-Tb(1)-O(6)#1   | 115.01(16) |
| O(4)-Tb(1)-O(16)   | 71.9(2)    | O(15)-Tb(1)-O(6)#1  | 144.63(18) |
| O(15)-Tb(1)-O(16)  | 100.0(2)   | O(16)-Tb(1)-O(6)#1  | 115.30(18) |
| O(6)-Tb(1)-O(8)#1  | 121.6(2)   | O(8)#1-Tb(1)-O(6)#1 | 49.38(18)  |
| O(10)-Tb(1)-O(8)#1 | 83.85(17)  | O(3)-Tb(1)-O(6)#1   | 138.74(17) |
| O(11)-Tb(1)-O(8)#1 | 84.93(17)  | O(4)-Tb(1)-O(8)#1   | 73.67(18)  |

Symmetry transformations used to generate equivalent atoms: #1:  $1-x, 1-y, -z$ .
